# Antifibrinolytic Therapy and Perioperative Considerations

Jerrold H. Levy, M.D., F.A.H.A., F.C.C.M., Andreas Koster, M.D., Quintin J. Quinones, M.D., Ph.D., Truman J. Milling, M.D., Nigel S. Key, M.B., Ch.B., F.R.C.P.

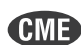

This article has been selected for the ANESTHESIOLOGY CME Program. Learning objectives and disclosure and ordering information can be found in the CME section at the front of this issue.

## ABSTRACT

Fibrinolysis is a physiologic component of hemostasis that functions to limit clot formation. However, after trauma or surgery, excessive fibrinolysis may contribute to coagulopathy, bleeding, and inflammatory responses. Antifibrinolytic agents are increasingly used to reduce bleeding, allogeneic blood administration, and adverse clinical outcomes. Tranexamic acid is the agent most extensively studied and used in most countries. This review will explore the role of fibrinolysis as a pathologic mechanism, review the different pharmacologic agents used to inhibit fibrinolysis, and focus on the role of tranexamic acid as a therapeutic agent to reduce bleeding in patients after surgery and trauma. (**ANESTHESIOLOGY 2018; 128:657-70**)

**F**IBRINOLYSIS is a physiologic component of hemostasis that functions to limit clot formation.<sup>1</sup> However, after tissue injury associated with trauma or surgery, ischemia and reperfusion, blood contact with large nonendothelial surfaces such as cardiopulmonary bypass (CPB) circuits, or as a contributing factor in other hemostatic disorders, excessive fibrinolysis may contribute to coagulopathy, bleeding, and inflammatory responses. As a result, growing data have reported the efficacy of antifibrinolytic agents to reduce bleeding, allogeneic blood administration, and adverse clinical outcomes. Of all the pharmacologic agents, tranexamic acid is the agent most extensively studied in the literature and used in most countries. This commentary will review the role of fibrinolysis as a pathologic mechanism, review the different pharmacologic agents used to inhibit fibrinolysis, and focus on the role of tranexamic acid as a therapeutic agent to reduce bleeding in patients.

## Fibrinolysis

Fibrinolysis regulates the extent of fibrin formation and vascular obstruction during hemostasis. After tissue and

vascular injury, multiple hemostatic mechanisms are initiated as shown in figure 1, resulting in thrombin generation, platelet adhesion, cross-linking of platelets, and fibrin formation.<sup>1,2</sup> As part of the hemostatic response to limit clot formation, fibrinolysis is initiated. Fibrin, the end product of coagulation activation, becomes the cofactor for plasminogen activation by tissue plasminogen activator. Plasmin, the enzymatic factor in fibrinolysis, then lyses fibrin, but as a promiscuous enzyme with respect to substrate specificity, it can also mediate the proteolytic (in)activation of multiple hemostatic and inflammatory components when present at concentrations that exceed the local and systemic inhibitors (most notably  $\alpha_2$ -antiplasmin), as shown in figures 1 and 2.<sup>1,3,4</sup> Overall, when regulated, fibrinolysis can be considered a protective physiologic response that appropriately limits clot size. However, after major tissue damage that occurs during surgical and traumatic injury, inhibiting fibrinolysis may potentially inhibit other responses that contribute to bleeding.<sup>2,5</sup> Fibrinolysis also contributes to coagulopathy by additional mechanisms beyond cleavage of fibrinogen and fibrin but also cleaving glycoprotein Ib and

This article is featured in "This Month in Anesthesiology," page 1A. Figures 1 and 2 were enhanced by Sara Jarret, C.M.I.

Submitted for publication July 27, 2017. Accepted for publication October 2, 2017. From the Division of Cardiothoracic Anesthesiology and Critical Care, Department of Anesthesiology, Duke University School of Medicine, Durham, North Carolina (J.H.L., Q.J.Q.); Institute of Anesthesiology, Heart and Diabetes Center North Rhine Westphalia, Bad Oeynhausen, Ruhr-University Bochum, Bochum, Germany (A.K.); Seton Dell Medical School Stroke Institute, Austin, Texas (T.J.M.); and the Department of Medicine, Division of Hematology/Oncology, University of North Carolina, Chapel Hill, North Carolina (N.S.K.).

Copyright © 2018, the American Society of Anesthesiologists, Inc. Wolters Kluwer Health, Inc. All Rights Reserved. Anesthesiology 2018; 128:657-70

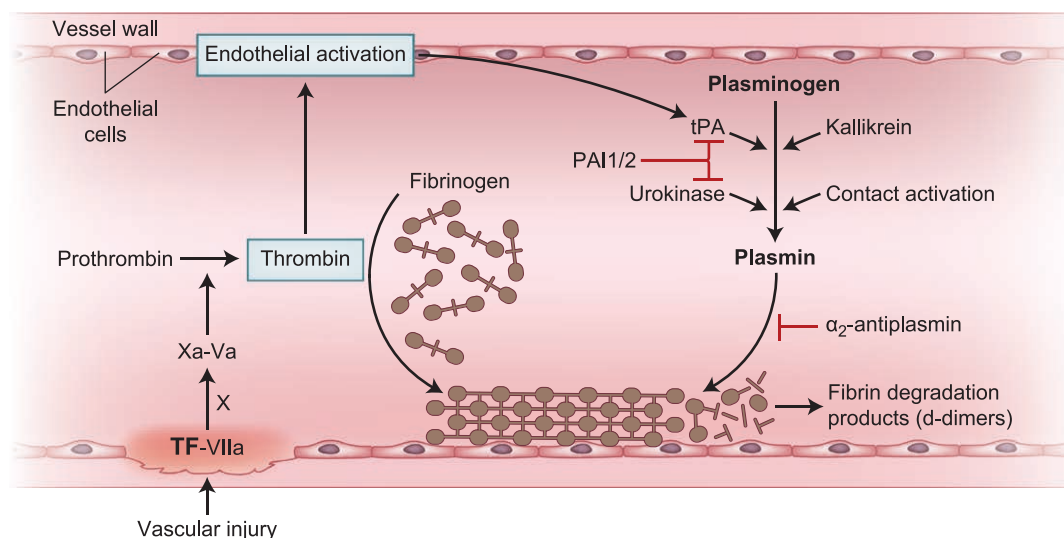

**Fig. 1.** Simplified fibrinolysis pathway. For clot formation, the principal event is fibrin formation following vascular injury, tissue factor binding to factor VIIa and activation of the Xase complex for hemostatic activation and thrombin generation. Thrombin stimulates endothelial release of tissue plasminogen activator (tPA), but also increased vascular flow, kinins, and other factors will release tissue plasminogen activator. Plasmin is released by formation of a plasminogen-tissue plasminogen activator complex that assembles on fibrin and binds to lysine sites on fibrin clot. Once assembled, tissue plasminogen activator cleaves plasminogen to its active form plasmin. Plasmin can also be generated by other mechanisms including urokinase, contact activation, and kallikrein mediated protease activation. Fibrinolysis is inhibited by plasminogen activator inhibitors (PAI 1 and PAI 2), and by thrombin binding to thrombomodulin to release and activate thrombin-activatable fibrinolysis inhibitor (not shown). PAI = plasminogen activator inhibitor; TF = tissue factor.

IIb/IIIa receptors on platelets reducing platelet adhesion and aggregation.<sup>6–8</sup>

Thus, plasmin may exhibit multiple proinflammatory responses that could stimulate pathophysiologic responses and multiorgan system failure. These adverse outcomes may be attenuated with antifibrinolytic agents, and reports suggest that antifibrinolytic therapy may improve mortality in high-risk patients undergoing cardiac surgery.<sup>9–11</sup>

## Molecular Regulation of Fibrinolysis

The molecular activators of plasminogen are primarily tissue-plasminogen activator but also urokinase-plasminogen activator.<sup>2,6</sup> Endothelial activation by a variety of agonists releases tissue plasminogen activator from vascular endothelial cells, where it binds to fibrin and activates plasminogen to promote fibrinolysis at the site of clot formation. Activation of fibrinolysis is facilitated by sites in the plasminogen molecule that bind to fibrin's lysine residues.<sup>2,6</sup> Tranexamic acid, a synthetic derivative of lysine, interferes with this step by occupying the lysine-binding sites in plasminogen.

The molecular inhibitors of fibrinolysis include plasminogen activator inhibitor 1, which inhibits tissue plasminogen activator, and plasminogen activator inhibitor 2, which inhibits urokinase-plasminogen activator.<sup>2</sup> The physiologic inhibitor of plasmin is  $\alpha_2$ -antiplasmin but is currently called plasmin inhibitor. Also,  $\alpha_2$ -macroglobulin functions as a plasmin inhibitor. Factor XIIIa, a transglutaminase, cross-links fibrin to increase clot strength and render it more resistant to fibrinolysis.<sup>12</sup> Thrombin activatable fibrinolysis inhibitor,

when activated by the thrombin-thrombomodulin complex, removes lysine residues on fibrin, eliminating binding sites for plasminogen, and may play an important role in regulating cross-talk between inflammation and coagulation.<sup>13</sup>

With normal physiology, including an intact vascular and endothelial system, hemostatic balance is well preserved. However, after massive trauma, surgery, or extracorporeal circulation, the ability to locally regulate fibrinolysis is exceeded, such that plasmin generation and ensuing fibrinolysis become systemic, and coagulopathy ensues. This is the basis of pharmacologic administration of tranexamic acid that will be reviewed. Although increasing data suggest the critical role of hyperfibrinolysis as a pathologic cause of bleeding, there is individual variability of fibrinolysis in all pathologic states. This has led to potential concerns for an increase of plasminogen activator inhibitor 1 and a decrease of tissue plasminogen activator activity in some patients, a scenario that has been termed *fibrinolytic shutdown*.<sup>14,15</sup> The theory is that patients with fibrinolytic shutdown would not be expected to benefit from an antifibrinolytic such as tranexamic acid, and may develop potential thrombotic effects. However, the clinical relevance of fibrinolytic shutdown is the subject of ongoing debate and research.<sup>15–17</sup>

## Laboratory Measurement of Fibrinolysis

Over the years, multiple methods to assess fibrinolytic activity in blood have been reported; however, there is no “gold standard” test.<sup>4</sup> Available assays vary depending on whether whole blood, plasma, or the euglobulin fraction of plasma is used for

the assessment of fibrinolysis. Point-of-care testing using whole blood in a perioperative setting has the benefit of evaluating all plasma and cellular components including erythrocytes, platelets, and mononuclear and polymorphonuclear leukocytes.

The most extensively used tools for measuring fibrinolysis in a perioperative setting are thromboelastography and rotational thromboelastometry that use different activators, including kaolin, tissue factor, or ellagic acid to measure viscoelastic changes in whole blood over time. Fibrinolysis is measured by the rapidity of tapering of the clot over time and is expressed as maximal lysis for rotational thromboelastometry. Maximal lysis greater than 3% is the critical value for initiation of antifibrinolytic therapy in trauma, while a value of greater than 15% suggests hyperfibrinolysis.<sup>4,18,19</sup>

Thromboelastography/thromboelastometry is the test most often used clinically to determine fibrinolysis in trauma patients.<sup>20</sup> With the increasing use of preemptive antifibrinolytic therapy to reduce bleeding in trauma and surgery, there is some debate regarding the need for assessment of fibrinolysis. However, based on concerns regarding fibrinolytic shutdown in a subset of patients, there is growing interest in monitoring fibrinolysis in trauma.<sup>16</sup> Thromboelastography and rotational thromboelastometry are frequently used to assess fibrinolytic activation in trauma patients. However, they are not sensitive enough to detect minor degrees of fibrinolytic activation.<sup>15,18,21,22</sup> There is ongoing debate about their utility to detect fibrinolytic activation and guide antifibrinolytic agent administration.<sup>19</sup>

Other methods of evaluating fibrinolysis include plasma turbidity methods based on measuring optical density changes that reflect fibrin formation and lysis.<sup>4</sup> The classic test for fibrinolysis is the euglobulin clot lysis time developed in the 1950s that acidifies citrated platelet-poor plasma to selectively precipitate certain factors including fibrin(ogen), plasminogen, and tissue plasminogen activator, while largely excluding the principal inhibitors of fibrinolysis (plasminogen activator inhibitor 1,  $\alpha_2$ -antiplasmin, and  $\alpha_2$ -macroglobulin). This “rebalancing” of plasma components within the precipitate (the euglobulin fraction) allows the measurement of endogenous fibrinolysis, which is normally inhibited by the large excess of fibrinolytic inhibitors. The clot within the euglobulin fraction can be visually evaluated until complete lysis occurs.<sup>4</sup> Although there is no single gold standard assay for global measurement of fibrinolysis, thromboelastography and rotational thromboelastometry are the assays that are most often used in practice.

### Pharmacology of Antifibrinolytic Agents

The two mainstay antifibrinolytic agents are the synthetic lysine analogs tranexamic acid and  $\epsilon$ -aminocaproic acid that inhibit fibrinolysis by attaching to the lysine-binding site of the plasmin(ogen) molecule, thereby displacing plasminogen from fibrin. Both tranexamic acid and  $\epsilon$ -aminocaproic acid were developed and approved for use by regulatory agencies more than 50 yr ago when it was found that some amino

acids such as lysine and its analogs inhibited the activation of plasminogen *in vitro*.<sup>23</sup> Aprotinin, another fibrinolytic inhibitor, is a broad-spectrum, naturally occurring protease inhibitor that is only available in certain countries. Other molecular entities have been studied as potential fibrinolytic inhibitors but are not approved for use, including nafamostat, MDCO-2010, and textilins from *Pseudonaja textilis*.<sup>24–26</sup> The three clinically available agents will be reviewed as follows.

### Aprotinin

Aprotinin is a protease inhibitor isolated from bovine lung and is comprised of 58 amino acids with a molecular weight of 6,512 Da. The molecular structure with its three kringle is structurally similar to tissue factor pathway inhibitor. Aprotinin dosing is calculated in “kallikrein inhibiting units” and protocols usually follow a “full-dose” ( $2 \times 10^6$  kallikrein inhibiting units bolus followed by  $5 \times 10^5$ /h continuous infusion) or a “half-dose” protocol. The agent is predominantly eliminated *via* proteolysis and only to a minor extent *via* the kidneys. The initial plasma half-life is 150 min, with a terminal half-life of approximately 10 h.<sup>27</sup>

Aprotinin is a broad-spectrum protease inhibitor that reversibly complexes with the active serine residue in various proteases in plasma; reversibly inhibits trypsin, kallikrein, plasmin, elastase; and is the most potent antifibrinolytic agent.<sup>28</sup> The propagation of fibrinolysis through Factor XIIa-mediated kallikrein activation (contact activation) and plasmin generation through tissue plasminogen activator-mediated plasminogen activation is inhibited by  $\sim 4 \mu\text{mol/l}$  of aprotinin.<sup>28</sup> However, apart from these direct effects on the plasmatic coagulation system, aprotinin also inhibits the protease-activated receptor 1 thrombin receptor involved in both coagulation and inflammation.<sup>29</sup> Aprotinin’s inhibition of protease-activated receptor 1 has been postulated to be a mechanism for stroke reduction after aprotinin administration for cardiac surgery.<sup>28,30,31</sup>

Despite multiple studies reporting its efficacy, several reports questioned its safety, leading to its temporary removal from the U.S. market. After a reanalysis of the data, the European Medicines Agency recommended in 2012 that its suspension in the European Union be lifted, and it is currently being reintroduced in Europe. However, the European Medicines Agency noted that aprotinin should only be given for “prophylactic use to reduce blood loss and blood transfusion in adult patients who are at high risk of major blood loss undergoing isolated cardiopulmonary bypass graft surgery (i.e. coronary artery bypass graft surgery that is not combined with other cardiovascular surgery” and “only after careful consideration of the benefits and risks, and the consideration that alternative treatments are available”) ([http://www.ema.europa.eu/docs/en\\_GB/document\\_library/Referrals\\_document/Antifibrinolytic\\_medicines/WC500153601.pdf](http://www.ema.europa.eu/docs/en_GB/document_library/Referrals_document/Antifibrinolytic_medicines/WC500153601.pdf); accessed November 18, 2017). Additionally, the European Medicines Agency required the establishment of a European registry for aprotinin use ([http://www.ema.europa.eu/docs/en\\_GB/document\\_library/](http://www.ema.europa.eu/docs/en_GB/document_library/)

Press\_release/2012/02/WC500122914.pdf; accessed November 18, 2017). The European Society of Anaesthesiology task force reported on aprotinin use in a perioperative setting and has current suggestions for its use.<sup>32</sup>

### **$\epsilon$ -Aminocaproic Acid**

$\epsilon$ -Aminocaproic acid is a synthetic inhibitor of plasminogen activation with a molecular weight of ~131 Da. Pharmacokinetic studies evaluating intravenous  $\epsilon$ -aminocaproic acid of 10 g or 100 mg/kg in volunteers produced an initial concentration of about 1.5 g/l that decreased to 35 mg/l within 3 to 4 h, and 80 to 100% was eliminated in the urine by filtration.<sup>33–35</sup> *In vitro* experiments and clinical studies report that a plasma  $\epsilon$ -aminocaproic acid concentration of ~130  $\mu$ g/ml is required to inhibit systemic fibrinolytic activity.<sup>33–35</sup> Since  $\epsilon$ -aminocaproic acid is rapidly excreted in the urine, it must be administered intravenously as an infusion to maintain therapeutic concentrations. Nilsson *et al.* recommended a dose of 0.1 g/kg bodyweight every 3 to 4 h, whereas McNicol and Douglas recommended an initial loading dose of 10 g followed by a continuous intravenous infusion of 1 g/h to maintain a plasma concentration of ~130  $\mu$ g/ml.<sup>33,35,36</sup>

After intravenous administration, the volume of distribution is reported to be  $30.0 \pm 8.2$  l and is primarily eliminated by the kidneys, with 65% recovered unchanged, and 11% appearing as adipic acid.<sup>33–35</sup> The total body clearance is 169 ml/min with a terminal elimination half-life of ~2 h.<sup>33–35</sup> ([http://www.accessdata.fda.gov/drugsatfda\\_docs/label/2004/15197scm036,scf037,scp038,scm039\\_amicar\\_lbl.pdf](http://www.accessdata.fda.gov/drugsatfda_docs/label/2004/15197scm036,scf037,scp038,scm039_amicar_lbl.pdf); accessed November 18, 2017). The concentration of  $\epsilon$ -aminocaproic acid required to inhibit fibrinolysis is ~1 mM or 0.13 mg/ml, which is achieved with a 5-g load followed by 1 to 1.25 g/h, which should maintain plasma concentrations of 0.13 mg/ml.

$\epsilon$ -Aminocaproic acid is most extensively used in the United States compared to most countries that use tranexamic acid. This may be related to costs and that it was the first agent that was widely available. Side effects reported from  $\epsilon$ -aminocaproic acid include hypotension, cardiac arrhythmias, rhabdomyolysis, and renal dysfunction.<sup>37,38</sup>

### **Tranexamic Acid**

Tranexamic acid is a lysine analog with a molecular weight of ~157 Da that reversibly binds to the lysine-binding sites on plasminogen to inhibit its affinity to bind to multiple proteins including fibrin. After a 10 mg/kg intravenous dose of tranexamic acid, the half-life is ~80 min with 30% renal elimination within the first hour, while after oral administration of 10 to 15 mg/kg, peak plasma concentrations occur within 3 h.<sup>39</sup> Andersson *et al.* reported that 98 to 100% reduction of fibrinolytic activity required concentrations of ~100 mg/l.<sup>40</sup>

After intravenous administration of 10 mg tranexamic acid/kg body weight, 30% was recovered in the urine by 1 h, 55% by 3 h, and 90% within 24 h. Further studies indicated that tranexamic acid, like  $\epsilon$ -aminocaproic acid, is eliminated

by glomerular filtration.<sup>39</sup> Also similar to  $\epsilon$ -aminocaproic acid, tranexamic acid is distributed throughout the intracellular and extracellular compartments.<sup>36</sup> On a molar basis, tranexamic acid is 7 to 10 times more potent than  $\epsilon$ -aminocaproic acid and has more sustained antifibrinolytic activity in tissues.<sup>36,40</sup>

Intravenous dosing ranges from ~0.5 to 25 g depending on the types of patients and procedures. In one of the largest studies to date of tranexamic acid, the Clinical Randomization of an Antifibrinolytic in Significant Hemorrhage (CRASH-2) trial, conducted in patients with posttraumatic bleeding, tranexamic acid was administered as a loading dose of 1 g intravenously followed by an infusion of 1 g over 8 h. In orthopedic surgery, tranexamic acid doses usually range from 0.5 to 2 g. Recent studies have utilized a loading dose of 4 g intravenously over 1 h followed by infusion of 1 g/h over 6 h.<sup>41,42</sup> For excessive menstrual bleeding, based on the U.S. prescribing information, tranexamic acid is given orally (Lysteda; Ferring-Parsippany, New Jersey) at doses of 1.3 g every 8 h for up to 5 days.

Despite the potential toxicity concerns, side effects are uncommon, as noted in patients with heavy menstrual bleeding receiving oral doses of 1.3 g three times daily for 4 to 5 days.<sup>43</sup> Oral tranexamic acid is currently approved by the Food and Drug Administration and in other countries, with an impressive safety record, for reducing bleeding in women with idiopathic menorrhagia. Its efficacy is thought to be explained by inhibition of increased fibrinolytic activity in the endometrium during the initial days of menstruation. However, macroscopic hematuria with bleeding from the upper renal tract is considered a contraindication to tranexamic acid due to concerns for clot obstruction in the ureters and reports of acute renal cortical necrosis with renal failure.<sup>23</sup>

### **Antifibrinolytic Therapy and Risk of Thrombosis**

The potential role of antifibrinolytic therapy producing hypercoagulability is a potential concern among clinicians.<sup>44</sup> There may be a prothrombotic effect of plasmin during therapeutic fibrinolysis that is explained by plasmin-mediated prothrombin and platelet activation.<sup>45</sup> Multiple studies have reported that fibrinolysis and fibrinolytic therapy activate platelets and/or the plasma coagulation components both *in vitro* and *in vivo*.<sup>46–48</sup> Despite concerns about the potential for a prothrombotic effect of fibrinolytic inhibitors, thrombosis has not been a significant clinical issue. In randomized controlled trials of antifibrinolytics in major orthopedic surgery, cardiac surgery, or trauma (CRASH-2 trial), there were no increases in thrombotic complications compared to controls.<sup>49</sup> Of note is that in meta-analyses of tranexamic acid in orthopedic surgical patients, who are at particularly high risk for venous thromboembolism, no increased incidence of venous thromboembolism was observed compared to controls.<sup>50–52</sup> Moreover, one analysis reviewed thrombotic events as an outcome in 5,049 subjects from 57 studies of patients treated with tranexamic acid,  $\epsilon$ -aminocaproic acid, or aprotinin for various types of bleeding not related to trauma or surgery.<sup>53</sup> A total of 3,616



(72%) had subarachnoid hemorrhages, of whom 3,414 (68%) patients received tranexamic acid and 1,635 (32%) received  $\epsilon$ -aminocaproic acid. The frequencies of limb ischemia and myocardial infarction were less than 1% for tranexamic acid and  $\epsilon$ -aminocaproic acid. The frequency of deep vein thrombosis or pulmonary embolism was 1.9% for tranexamic acid and 3.0% for  $\epsilon$ -aminocaproic acid.<sup>53</sup>

In orthopedic surgical patients undergoing total hip replacement or total knee arthroplasty, randomized controlled trials have compared the effect of tranexamic acid,  $\epsilon$ -aminocaproic acid, or aprotinin with placebo on bleeding, transfusion, or venous thromboembolic events. Tranexamic acid was used in the majority of trials, where patients also received routine mechanical and/or pharmacologic prophylaxis for deep vein thrombosis.<sup>54</sup> The mean age of patients ranged from 55 to 76 yr. The analyses showed no significant difference in risk of venous thromboembolism in patients receiving antifibrinolytic therapy compared to those receiving placebo in 1,637 patients. Additional subgroup analyses according to the antifibrinolytic therapy reported no significant differences in venous thromboembolic events between the treated and control groups.

In liver transplantation, from 23 studies involving 1,407 patients who received tranexamic acid or aprotinin, despite reduced bleeding and the need for transfusion, there was no increased risk for hepatic artery thrombosis, venous thromboembolic events, or perioperative mortality.<sup>55</sup>

### Antiinflammatory Effects of Inhibiting Fibrinolysis

One of the proposed benefits of inhibiting fibrinolysis is that plasmin and plasminogen have broad-spectrum inflammatory effects due to cellular binding, proteolytic activity, and generation of inflammatory mediators as shown in figure 1.<sup>56</sup> Plasmin, particularly when bound to the surface of macrophages, plays a critical role in monocyte activation and inflammation including exit from circulation into injured or infected tissue, cytokine production, and proteolytic activation of matrix-metalloproteases with subsequent degradation and remodeling of extracellular matrix. Activated plasmin elicits chemotaxis and actin polymerization in monocytes including the release of cytokines downstream of the transcription factors nuclear factor- $\kappa$ B, activator protein 1, and signal transducer and activator of transcription.<sup>57,58</sup>

Much of the data that demonstrate the role of plasmin and plasminogen in inflammation have been generated in experimental animal models that have included plasminogen knockout mice. Plasminogen null mice were found to have reduced macrophage infiltration into sites of inflammation after peritoneal thioglycollate injection as well as reduced abdominal aortic aneurysm formation after calcium chloride injection.<sup>59</sup> Reduction in macrophage infiltration and abdominal aortic aneurysm were associated with reduced matrix metalloprotease-9 activity. In this model, macrophage infiltration, matrix metalloprotease-9 activity,

and vascular remodeling leading to abdominal aortic aneurysm could be restored by injecting plasminogen knockout animals with activated plasmin. The dependence of these murine models of inflammation and vascular remodeling on the proteolytic activity of plasmin highlights its importance to innate immunity and inflammation.

The relationship between plasmin activity and inflammation has been studied in humans primarily during the use of antifibrinolytic drugs (tranexamic acid,  $\epsilon$ -aminocaproic acid, and aprotinin) to inhibit plasmin and decrease bleeding. In cardiac surgery, the effects of tranexamic acid and aprotinin were studied using whole blood mRNA expression profiling of inflammatory genes.<sup>60</sup> Of the 114 genes studied, eight produced less transcript in the presence of aprotinin, while three genes were inhibited by tranexamic acid and aprotinin, the broader spectrum of aprotinin most likely owing to its broader inhibitory activity against serine proteases and its effects on the protease-activated receptor 1/thrombin receptor of platelets.

Apart from cardiac surgery, inflammation secondary to bacterial infection and exposure to lipopolysaccharide results in plasmin generation, which may contribute to disseminated intravascular coagulation in septic shock. Macrophages and dendritic cells have several receptors for binding and activating plasminogen to plasmin<sup>11</sup> that in turn activate other proteases, digest extracellular matrix, and initiate an inflammatory response needed to fight infection. One study in humans has attempted to address the ability of systemically administered antifibrinolytic drugs to counteract the inflammation associated with lipopolysaccharide exposure. Healthy volunteers were given an intravenous bolus of *Escherichia coli*-derived lipopolysaccharide 4 ng/kg, preceded either by a 30-min infusion of tranexamic acid (2 g) or placebo.<sup>61</sup> In normal humans, lipopolysaccharide induces rapid increases in plasma of concentrations D-dimers and plasmin- $\alpha_2$ -antiplasmin complexes. Pretreatment with tranexamic acid before lipopolysaccharide administration greatly attenuates D-dimer and plasmin- $\alpha_2$ -antiplasmin complexes, indicating a reduction in the activity of free plasmin and protection against fibrinolysis. However, tranexamic acid pretreatment did not affect lipopolysaccharide-induced thrombin generation; expression of lipopolysaccharide-induced markers of leukocyte activation CD11b and CD66b on leukocytes; lipopolysaccharide-induced release of von Willebrand factor and E-selectin from endothelial cells; or lipopolysaccharide-induced production of tumor necrosis factor- $\alpha$ , interleukin-6, interleukin-8, and interleukin-10. Taken together, these results seem to suggest that tranexamic acid can inhibit the activity of free plasmin and fibrinolysis; however, many of the inflammatory effects are mediated by plasmin bound to the surface of leukocytes, where it is relatively protected from antifibrinolytic drugs. Plasmin's importance in initiating inflammation, leukocyte chemotaxis, and extracellular matrix remodeling is indisputable given the dramatic phenotype induced in plasminogen knockout mice. What is not fully clear is the degree to which antifibrinolytic drugs can modulate inflammation by limiting plasmin's proteolytic activity. Expression of several

inflammatory genes is altered by the administration of antifibrinolytic drugs in the setting of cardiac surgery. However, several lipopolysaccharide-induced aspects of plasmin activation are not affected by pretreatment with antifibrinolytics.

## Clinical Uses

### Cardiac Surgery

Cardiac surgery including CPB but also off-pump is arguably one of the most studied scenarios of antifibrinolytic use. Treated patients consistently demonstrate reduced bleeding and allogeneic transfusion requirements. We have previously reviewed the use of antifibrinolytic agents in cardiac surgery in this journal, as shown in table 1, and have noted that these drugs are an important part of perioperative blood conservation management.<sup>27</sup>

Despite this, the optimal dose of tranexamic acid is still not established. In a prospective, blinded dosing study, 148 patients were randomized to placebo, while five groups received intravenous tranexamic acid as loading doses that ranged from 2.5 to 40 mg/kg before incision, followed by an infusion of one-tenth the loading dose for 12 h.<sup>62</sup> The authors reported that patients receiving an initial 10 mg/kg loading dose followed by an infusion had significantly less chest tube drainage than with lower doses, but did not alter transfusions, and higher doses did not provide additional reductions in bleeding. Fiechtner *et al.* reported that a bolus 10 mg/kg dose with an infusion of  $1 \text{ mg} \cdot \text{kg}^{-1} \cdot \text{h}^{-1}$  was provided a tranexamic acid plasma concentration that inhibited fibrinolytic activity *in vitro*.<sup>63</sup> Dowd *et al.* calculated a loading dose of 30 mg/kg followed by  $16 \text{ mg} \cdot \text{kg}^{-1} \cdot \text{h}^{-1}$  for 6 h and 2 mg/kg added to the pump prime to achieve 100% inhibition of fibrinolytic activity (table 1).<sup>64</sup> Using this dosing strategy, Sharma *et al.* found mean plasma tranexamic acid concentration was consistently higher than the previously suggested threshold.<sup>65</sup>

With the increasing use of tranexamic acid in cardiac surgery and at higher doses, reports emerged about generalized convulsive seizures in the absence of new ischemic lesions on brain imaging, often in patients receiving higher tranexamic acid doses of 100 mg/kg intravenously followed by 20 to 50 mg  $\cdot \text{kg}^{-1} \cdot \text{h}^{-1}$  with a total dose up to 259 mg/kg.<sup>66</sup> Experimental models noted that hyperexcitability and seizures appeared in a dose-dependent fashion when tranexamic acid was applied topically onto central nervous system tissue. However, these concentrations are unlikely to be achieved in clinical practice.<sup>67</sup>

In the largest randomized clinical trial of tranexamic acid in cardiac surgery, Myles *et al.* randomized 4,631 coronary artery surgical patients to receive aspirin or placebo and tranexamic acid or placebo with a primary composite outcome of death and thrombotic complications that included nonfatal myocardial infarction, pulmonary embolism, stroke, renal failure, or bowel infarction within 30 days after surgery.<sup>68</sup> A total of 2,311 patients received tranexamic acid and there were 2,320 placebo patients. The primary outcome

event occurred in 386 tranexamic acid patients (16.7%) and 420 placebo patients (18.1%). Tranexamic acid reduced transfusion during hospitalization from 7,994 total units in placebo to 4,331 in the tranexamic acid group. Adverse events including hemorrhage or cardiac tamponade requiring reoperation occurred in 2.8% of placebo and 1.4% of tranexamic acid, and seizures occurred in 0.1% of placebo and 0.7% of tranexamic acid-treated patients.<sup>68</sup>

### Seizures and Tranexamic Acid

In 2010, clinicians began to report convulsive seizures after cardiac surgery with CPB using high-dose tranexamic acid initially, and from retrospective evaluations at lower doses.<sup>69</sup> In a recent meta-analysis of randomized controlled trials and retrospective studies, the use of tranexamic acid was associated with a 4.1-fold increased risk of clinical seizures.<sup>70</sup> Suggested mechanisms for tranexamic acid-induced seizures include increased neuronal excitation mediated by antagonizing inhibitory  $\gamma$ -aminobutyric acid neurotransmission and neural glycine receptors.<sup>67</sup> Tranexamic acid,  $\gamma$ -aminobutyric acid, and glycine have similar molecular structures. However, despite the similarities,  $\epsilon$ -aminocaproic acid, another lysine analog antifibrinolytic agent, has not been reported to produce seizures. Tranexamic acid's structure is similar to glycine that functions as an inhibitory neurotransmitter in the brain and spinal cord. In cardiac surgical patients, seizures are primarily observed in older patients after CPB for open heart surgery, where multiple other mechanisms including cerebral emboli may be responsible. With emboli, vascular injury may cause local disturbances of the blood-brain barrier, increase tranexamic acid concentrations at the site of injury in the brain, and potentially promote seizures, as we have previously speculated in an editorial in the journal.<sup>69</sup> Therefore, additional mechanisms may be responsible for producing seizures. This is particularly important because the risk of seizures seems insignificant in women receiving approximately 4 g a day of tranexamic acid for menstrual bleeding, in trauma patients in the large CRASH-2 trial who received 2 g of tranexamic acid, and in noncardiac surgical patients.

However, the impact of tranexamic acid-associated seizures after cardiac surgery on clinical outcomes is not well understood. Assuming a transient pharmacologic mechanism, one would expect only a minor effect on clinical outcomes, presumably with the exception of some critically ill patients where weaning from mechanical ventilation may be delayed. This consideration is consistent with an analysis of a large national database of more than 11,000 pediatric patients undergoing surgery for congenital heart disease.<sup>71</sup> The propensity matching resulted in more than 3,700 pairs of patients and reported the incidence of seizures was 8-fold increased (1.6% *vs.* 0.2%) in patients who received tranexamic acid, while all other clinical outcomes were comparable between groups. In contrast, in the aforementioned large randomized clinical trial in coronary artery bypass patients, the seizure rate in the tranexamic acid

**Table 1.** Antifibrinolytic Agents: Drug Descriptions, Doses, and Mechanisms of Action

| Drug                | Composition                               | Mechanism of Action                                                                                                                                                                                                                         | Elimination                           | Pharmacodynamics                                                             | Suggested Dosing in Adults                                                                                                                                                                                                                                                   | Approval                                                                                                      |
|---------------------|-------------------------------------------|---------------------------------------------------------------------------------------------------------------------------------------------------------------------------------------------------------------------------------------------|---------------------------------------|------------------------------------------------------------------------------|------------------------------------------------------------------------------------------------------------------------------------------------------------------------------------------------------------------------------------------------------------------------------|---------------------------------------------------------------------------------------------------------------|
| Aprotinin           | Protein, isolated from bovine lung tissue | Protease inhibitor<br>Reversibly complexes with the active sites of plasmin, kallikrein, and trypsin<br>Inhibition of fibrinolysis. Factor Xlla-induced contact activation, thrombin-induced platelet activation, and inflammatory response | Predominantly proteolysis, ~60% renal | Initial plasma T <sub>1/2</sub> 150 min, terminal T <sub>1/2</sub> life 10 h | Full dose: 2 × 10 <sup>6</sup> KIU bolus patient, 2 × 10 <sup>6</sup> KIU bolus CPB, continuous infusion of 5 × 10 <sup>6</sup> KIU<br>Half dose: 1 × 10 <sup>6</sup> KIU bolus patient, 1 × 10 <sup>6</sup> KIU bolus CPB, continuous infusion of 2.5 × 10 <sup>6</sup> KIU | Suspended since 2008<br>Suspension lifted in Canada in 2011 and Europe in 2012<br>In the U.S. still suspended |
| Tranexamic acid     | Synthetic lysine analog                   | Antifibrinolytic; competitive inhibition of the activation of plasminogen to plasmin                                                                                                                                                        | Renal                                 | Plasma ½ life 3 h                                                            | High dose: 30 mg/kg bolus patient, 2 mg/kg CPB, continuous infusion of 16 mg/kg<br>Low dose: 10 mg/kg bolus patient, 1–2 mg CPB, continuous infusion of 1 mg/kg                                                                                                              | U.S., Canada, Europe                                                                                          |
| ε-Aminocaproic acid | Synthetic lysine analog                   | Antifibrinolytic; competitive inhibition of the activation of plasminogen to plasmin                                                                                                                                                        | Renal                                 | Plasma T <sub>1/2</sub> life 2 h                                             | 100 mg/kg bolus patient, 5 mg/kg CPB, continuous infusion of 30 mg/kg                                                                                                                                                                                                        | U.S., Canada                                                                                                  |

Modified with permission from Koster *et al.*<sup>27</sup>  
CPB = cardiopulmonary bypass.

group was 7-fold increased (15 patients [0.7%] *vs.* 2 patients [0.1%]) and seizures were associated with a 9.52-fold risk of 30-day mortality.<sup>68</sup> However, in these patients, the relative risk for stroke was nearly 22-fold. Patient numbers are too small to draw any definitive conclusions. However, these data suggest that besides temporal pharmacologic effects, other mechanisms contributed to the seizures and persisting neurologic damage.

### Liver Surgery

Bleeding and coagulopathy in patients undergoing liver surgery or transplantation are common. In patients with hepatic dysfunction, complex alterations in hemostatic function are common due to multiple causes, and excessive bleeding is common during these procedures. Hyperfibrinolysis is also common during liver transplantation.<sup>72</sup> During the early development of liver surgery and transplantation, hyperfibrinolysis was reported using thromboelastography, and empiric antifibrinolytics were initially used by transplant pioneer Dr. Thomas Starzl to reduce bleeding. Several years later, when further evaluating coagulopathy associated with liver transplantation, potential concerns regarding venous thromboembolism and increased mortality were reported. The routine use of tranexamic acid and antifibrinolytic agents overall is variable. During hepatic transplantation, tissue plasminogen activator concentrations may be increased during the anhepatic phase of transplantation due to vascular injury and reduced clearance. After reperfusion of the transplanted liver, tissue plasminogen activator clearance and plasminogen activator inhibitor 1 release often correct the hyperfibrinolysis. Most liver transplant centers use viscoelastic monitoring with rotational thromboelastometry or thromboelastography as a guide for the use of tranexamic acid for hyperfibrinolysis.

Molenaar *et al.* reported a meta-analysis of safety and efficacy in randomized clinical trials of antifibrinolytics used in liver transplantation up to 2007 that included tranexamic acid, aprotinin, and ε-aminocaproic acid. A total of 23 studies with 1,407 patients were analyzed and found that both aprotinin and tranexamic acid reduced the need for allogeneic transfusions, without safety concerns that included hepatic artery thrombosis, venous thromboembolic events, or perioperative mortality.<sup>55</sup>

Additional studies include a randomized multicenter evaluation of primary liver transplantation in 137 patients with high- and low-dose aprotinin published in 2000.<sup>73</sup> Blood loss was reduced in the aprotinin-treated patients by 44 to 60%, transfusion requirements were 20 to 37% lower, and there were no differences in mortality or thromboembolic events among the groups.<sup>73</sup> In another trial of 132 patients undergoing hepatic transplantation, patients were randomized to tranexamic acid, ε-aminocaproic acid, or placebo. Transfusions were reduced in the tranexamic acid-treated patients, and there was no benefit of ε-aminocaproic acid, and no intergroup difference with regard to transfusion requirements, thromboembolic events, and mortality.<sup>74</sup>

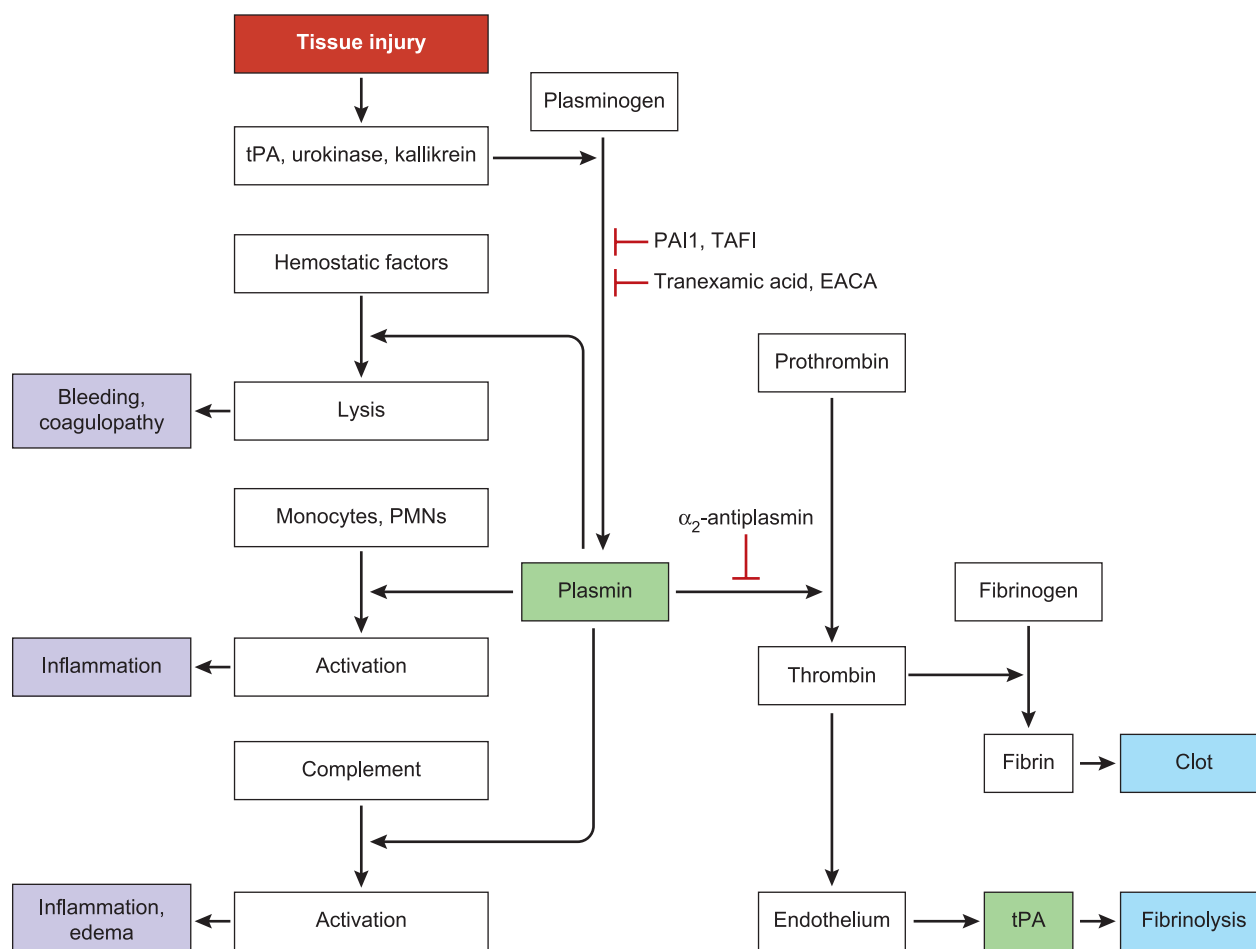

**Fig. 2.** Multiple pathways are responsible for generation of plasmin, including endothelial activation and release of tissue plasminogen activator (tPA), contact activation, and kallikrein-mediated plasmin activation. Plasmin generation and activity are also inhibited by plasminogen activator inhibitor 1 (PAI1), thrombin-activatable fibrinolysis inhibitor (TAFI), lysine analogs (tranexamic acid and  $\epsilon$ -aminocaproic acid [EACA]), and  $\alpha_2$ -antiplasmin. Plasmin generation after tissue injury can induce many other responses, including thrombin generation and cleavage of fibrinogen to fibrin. Plasmin also binds and activates monocytes, neutrophils, platelets, and endothelial cells, to increase proinflammatory responses and multiorgan system failure. Attenuation of these pathophysiologic responses with tranexamic acid might provide additional mechanisms to restore hemostatic balance and control of plasmin generation and fibrinolysis, as shown in the Clinical Randomization of an Antifibrinolytic in Significant Hemorrhage (CRASH-2) trial. After trauma, tissue injury shifts the complex balance of fibrinolysis to additional plasmin generation, and activation that increases coagulopathy, inflammatory responses, and bleeding. Modified with permission from Levy.<sup>5</sup> PMN = polymorphonuclear leukocyte.

There are fewer data for antifibrinolytic use in patients undergoing hepatic resection. In a prospective randomized trial for hepatic tumor resections, tranexamic acid was compared to placebo in 214 hepatectomies with continuation of therapy every 6 h for 3 days. The authors noted lower blood losses, transfusions, shorter operative times, and lower hospital costs in the tranexamic acid-treated patients. There were no differences in adverse outcomes including thromboembolic events or mortality.<sup>75</sup>

### Orthopedic Surgery

Multiple clinical trials have reported the efficacy of antifibrinolytic therapy in reducing bleeding and transfusion requirements in orthopedic surgery. Zufferey *et al.* reported

a meta-analysis examining efficacy for reducing perioperative allogeneic erythrocyte transfusion from 43 randomized controlled trials in total hip and knee arthroplasty, spine fusion, musculoskeletal sepsis, or tumor surgery performed before July 2005.<sup>76</sup> The report included 23 trials with 1,268 patients receiving aprotinin, 20 trials with 1,084 patients receiving tranexamic acid, and 4 trials with 171 patients receiving  $\epsilon$ -aminocaproic acid. Both aprotinin and tranexamic acid significantly reduced patient need for erythrocyte transfusions with an odds ratio of 0.43 for aprotinin and 0.17 for tranexamic acid.<sup>76</sup>

Additional randomized clinical trials in patients undergoing primary total hip arthroplasty using only tranexamic acid at doses of 0.5 to 2 g reported on 505 patients from



11 studies for total hip arthroplasty. Tranexamic acid significantly reduced perioperative bleeding and allogeneic transfusion requirements compared to the control group, with no differences in venous thromboembolism or other adverse events using dosing strategies of ~1 g before incision (10 to 15 mg/kg), with or without additional dosing by continuous infusion or repeat dosing.<sup>50</sup>

For primary total knee arthroplasty, a meta-analysis up to 2012 reported 1,114 patients from 19 randomized clinical trials and noted tranexamic acid reduced postoperative bleeding and transfusion requirements without differences in venous thromboembolism or other adverse events in the immediate postoperative period.<sup>77</sup> In a meta-analysis of 411 patients from six randomized clinical trials, tranexamic acid at doses of greater than or equal to 15 mg/kg reduced bleeding and the need for transfusion without safety concerns, including venous thromboembolism.<sup>78</sup>

Multiple studies have reported that tranexamic acid reduces blood loss and transfusions in patients undergoing total knee arthroplasty. Tranexamic acid is routinely used for total knee arthroplasty, whereas  $\epsilon$ -aminocaproic acid is less frequently used. As a result, a multicenter retrospective chart review of elective unilateral total knee arthroplasty from April 2012 through December 2014 was performed that included five hospitals within a healthcare system.<sup>79</sup> The authors collected age, severity of illness score, sex, use of antifibrinolytic agent and dose, erythrocyte transfusions, and preadmission and discharge hemoglobin. There were a total of 2,922 primary unilateral total knee arthroplasty cases of which 820 patients received 5 or 10 g of  $\epsilon$ -aminocaproic acid, 610 patients received tranexamic acid, and 1,492 patients received no antifibrinolytic therapy (control group).<sup>79</sup> The proportion of patients transfused with  $\epsilon$ -aminocaproic acid was 2.8%, tranexamic acid 3.2%, and controls 10.8% with lower mean erythrocyte units transfused per patient. However, there were no differences between the  $\epsilon$ -aminocaproic acid and tranexamic acid groups in the number of erythrocyte units transfused per patient, percentage of patients transfused, or discharge hemoglobin concentrations.<sup>79</sup>

The same investigators similarly evaluated antifibrinolytic use in total hip arthroplasty in a retrospective chart review of 1,799 primary unilateral total hip arthroplasty cases from April 2012 through December 2014, of whom 711 received  $\epsilon$ -aminocaproic acid, 445 received tranexamic acid, and 643 received no antifibrinolytic agent.<sup>80</sup> Erythrocyte transfusions were 6.8% in the  $\epsilon$ -aminocaproic acid-treated patients, 9.7% in the tranexamic acid group, and 24.7% in patients receiving no therapy, although no differences were noted in mean erythrocyte units per patient and percentage of patients transfused between the antifibrinolytic-treated patient groups.

Antifibrinolytic therapy in most surgical procedures, including orthopedic surgery, is limited to intraoperative use. In a recent study, Zufferey *et al.* examined whether additional postoperative tranexamic acid infusion could further

reduce blood loss and need for allogeneic transfusions in a randomized, blinded, prospective study of 168 patients for primary hip arthroplasty.<sup>81</sup> A 1-g tranexamic acid loading dose was initially administered followed by a continuous infusion of 1 g or placebo for 8 h along with a restrictive transfusion algorithm. There were no differences between the groups, and the authors also performed a meta-analysis combining this study with five other similar trials and found no differences in bleeding or transfusion rates.

### Postpartum Hemorrhage

Postpartum hemorrhage is a leading cause of maternal morbidity and mortality worldwide. Hematologic changes in pregnancy at the time of delivery include decreased plasminogen activator inhibitor 2 synthesis and tissue plasminogen activator release and hyperfibrinogenemia at concentrations of 500 to 600 mg/dl. Multiple studies in different patient populations have evaluated tranexamic acid as a therapeutic agent to reduce bleeding and improve outcomes. In two initial randomized clinical trials, tranexamic acid was given as 1 g or 0.5 g intravenously 2 to 3 min after vaginal delivery, or 1 g intravenously before incision for cesarean section.<sup>82</sup> The authors reported blood loss was reduced with tranexamic acid but there were no differences between the chosen doses.<sup>82</sup> In an analysis of more than 1,000 women from five randomized clinical trials undergoing elective cesarean section, tranexamic acid at doses of 1 g intravenously before incision reduced bleeding.<sup>83</sup>

For a more definitive answer, the recently reported World Maternal Antifibrinolytic trial was a randomized, double-blind, placebo-controlled trial evaluating early administration of tranexamic acid on mortality, hysterectomy, and other relevant outcomes with postpartum hemorrhage. Recruitment was from March 2010 to April 2016 in 20,060 women after vaginal delivery or caesarean section from 193 hospitals in 21 countries.<sup>84</sup> Tranexamic acid was administered as a 1-g intravenous dose, but if bleeding persisted or restarted within 24 h of the first dose, a second 1-g dose could be given. The composite primary endpoint was death from all causes or hysterectomy within 42 days and was analyzed on an intention-to-treat basis. Death due to bleeding was reduced in tranexamic acid-treated women (1.5%, 155/10,036 patients compared to 1.9%, 191/9,985 in the placebo group; risk ratio, 0.81;  $P = 0.045$ ). When tranexamic acid was given within 3 h of delivery, mortality was 1.2% compared to 1.7% in placebo (risk ratio, 0.69;  $P = 0.008$ ), and there were no differences in hysterectomy in tranexamic acid-treated patients *versus* controls (3.6% *vs.* 3.5%). The composite primary endpoint of all-cause mortality or hysterectomy was not reduced with tranexamic acid (5.3% *vs.* 5.5%), and there were no differences in adverse events between the groups.<sup>84</sup>

### Traumatic Injury

Despite the extensive use of antifibrinolytic therapy and tranexamic acid for multiple other indications, its use in

trauma has significantly increased only in recent years. Fibrinolysis follows tissue injury as initially noted. However, multiple studies have helped better define fibrinolysis after trauma. In a study of 303 trauma patients, rotational thromboelastometry, D-dimer, and plasmin-antiplasmin complexes were used to better define implications of traumatic injury. Fifty-seven percent had “moderate” hyperfibrinolysis detected by the biomarker concentrations but not rotational thromboelastometry, while 5% had severe hyperfibrinolysis, detected by the biomarkers and rotational thromboelastometry. The combined hyperfibrinolysis groups had increased 28-day mortality compared to patients without hyperfibrinolysis (12% *vs.* 1%;  $P < 0.001$ ).<sup>21</sup>

In the CRASH-2 trial, adult trauma patients were randomized within 8 h of injury to a 1-g intravenous loading dose of tranexamic acid followed by a 1-g infusion over 8 h compared to placebo. The primary outcome was in-hospital 28-day mortality. From 10,060 patients randomized to receive tranexamic acid compared to 10,067 receiving placebo, mortality was reduced with tranexamic acid (14.5 *vs.* 16.0%;  $P = 0.0035$ ), and the risk of death due to bleeding was also significantly reduced. Additional analyses of the 35% of patients who died from bleeding reported that the benefit from tranexamic acid was greatest when administered within the first hour of injury, but if given more than 3 h after injury, mortality was paradoxically increased. Despite the novelty and the results of CRASH-2, the mortality difference of 1.5% was rather small and statistically significant due to a large number of patients studied. The performance and results of this large trial have been the subject of an intensive controversial debate.<sup>85</sup> Only approximately 5% of patients died because of bleeding, and only 50% of patients received blood transfusions. Most of the patients were studied in countries where rapid access to blood products, damage-control surgery, angiography, laboratory testing, and advanced critical care were not available. As there was no difference in the amount of blood transfused between groups, the mechanism of the effect of tranexamic acid on outcomes remains undetermined. Additional trials are underway, including Pre-hospital Anti-fibrinolytics for Traumatic Coagulopathy and Hemorrhage (PATCH), a prospective, randomized, placebo-controlled multicenter study that will include 1,200 patients in Australia and New Zealand. Modern trauma care, examination of coagulation, fibrinolysis, transfusion requirements, and incidence of vascular occlusive complications as well as effects on inflammation, immune function, and sepsis will be examined to advance knowledge regarding the role of tranexamic acid in trauma (<https://clinicaltrials.gov/ct2/show/NCT02187120>; accessed November 18, 2017).

A *post hoc* evaluation of CRASH-2 evaluated outcomes in 270 participants with intracranial bleeding. Although either benefits or harmful effects could not be excluded, the results suggested tranexamic acid warranted further research. The ongoing study in the United Kingdom's Tranexamic acid in IntraCerebral Hemorrhage (TICH) trial will include 2,000

participants with a closure date of 2018. The protocol for tranexamic acid/placebo is the same as in CRASH-2 (<http://www.controlled-trial.com/ISRCTN50867461>; accessed November 19, 2017). Another trial in progress is CRASH-3: tranexamic acid for the treatment of significant traumatic brain injury (<http://www.isrctn.com/ISRCTN93732214>; accessed November 18, 2017). Ten thousand patients within 8 h of injury with any intracranial bleeding on computerized tomography will be recruited. Finally, a trial of prehospital tranexamic acid treatment in moderate to severe traumatic brain injury is expected to enroll 967 patients (NCT01990768). The trial will randomize patients to three groups dosed by ambulance crews with 1 g tranexamic acid, 2 g tranexamic acid, or placebo.

### Fibrinolytic Shutdown in Trauma

One of the major arguments surrounding the routine use of antifibrinolytic agents in trauma is the concern about fibrinolytic shutdown. As previously mentioned, although hyperfibrinolysis in an important pathologic cause of bleeding, considerable individual variability in the fibrinolytic profile at baseline has been noted. This includes a subgroup with increased circulating plasminogen activator inhibitor 1 and decreased tissue plasminogen activator activity, a profile that is termed *fibrinolytic shutdown*.<sup>14,15</sup>

As a result of the recent widespread use of thromboelastography and rotational thromboelastometry in trauma, hyperfibrinolysis has been identified in a subgroup of severely injured patients, and this has been proposed as a contributing cause of bleeding in trauma-induced coagulopathy.<sup>86</sup> Acutely injured patients with severe hyperfibrinolysis after 30 min based on thromboelastography findings are reported to have mortality rates exceeding 70%.<sup>18,22,87</sup> Based on the CRASH-2 trial, many trauma centers throughout the world use tranexamic acid for all major trauma patients. However, among patients with trauma-induced coagulopathy, phenotypic distinction between those with global factor deficiency *versus* those with hyperfibrinolysis is apparent.<sup>14,15</sup> Moore *et al.* hypothesize that tissue injury and hemorrhagic shock produce distinct and opposing phenotypic effects on fibrinolysis, such that untimely inhibition of fibrinolysis in those with fibrinolytic shutdown may result in increased mortality.<sup>15</sup> Despite these concerns, we believe the overwhelming safety of antifibrinolytic therapy, the variability of fibrinolytic phenotype at different times after tissue injury for a given individual, and the potential for clotting factor and blood product administration to worsen hypercoagulability continue to make this perspective controversial.

### Intracranial Hemorrhage and Neurosurgery

In patients with intracranial hemorrhage, continued bleeding or expansion of the hematoma is a major cause of morbidity and mortality. After a subarachnoid hemorrhage, a recurrence of bleeding within the first 24 h is reported to occur in 9 to 17% of patients and is associated with a mortality of ~60%.<sup>88,89</sup> Antifibrinolytic therapy after subarachnoid hemorrhage is

reported to reduce rebleeding by 35 to 40%, although outcomes are not improved due to delayed cerebral ischemia after injury, and overall due to adverse effects of intracranial hemorrhage.<sup>90,91</sup>

A Cochrane review of nine studies between 1973 and 2000 reported that with antifibrinolytic therapy, outcomes were not improved because of cerebral ischemia.<sup>90</sup> However, eight of the nine trials were published before 1990, and current standard therapies including calcium channel blockers and other interventions including triple H therapy (hypertension, hypervolemia, and hemodilution) for vasospasm prophylaxis were not used, which might account for the higher number of ischemic events. However, even with current therapies for vasospasm, studies suggest rebleeding is reduced but without benefit on neurologic outcomes.<sup>92</sup>

In a study from three Swedish hospitals published in 2002 not included in the mentioned Cochrane review, Hillman *et al.* studied 596 patients with subarachnoid hemorrhage randomized to receive tranexamic acid at 1 g every 6 h until the aneurysm was clipped, coiled, or secured.<sup>93</sup> A total of 70% of aneurysms were treated within 24 h of admission. Although the study was not blinded, the tranexamic acid–treated patients had a lower rebleeding rate within the first 24 h of 2.4% *versus* 10.8% for controls. Also, rebleeding occurred in 30 of the 33 patients within the first 8 h. However, there were only nonsignificant trends of improved mortality (16.3 *vs.* 12.9%) and outcomes (Glasgow outcome score 4 or 5, 70.5 *vs.* 74.8%) in the tranexamic acid–treated patients, albeit without other concerns for adverse events.<sup>93</sup>

Starke *et al.* reported a similar study but with  $\epsilon$ -aminocaproic acid<sup>94</sup> in 248 patients with subarachnoid hemorrhage who received a 4-g loading dose followed by a 1 g/h infusion. A total of 73 patients received  $\epsilon$ -aminocaproic acid with a lower rebleeding rate in treated patients of 2.7% compared to 11.4% in controls but with an increased incidence of lower extremity deep vein thrombosis.<sup>94</sup>

Harrigan *et al.* retrospectively analyzed 356 patients with subarachnoid hemorrhage treated with  $\epsilon$ -aminocaproic acid on intensive care unit admission.<sup>95</sup> Treatment of the ruptured aneurysm occurred an average of 47.4 h after hospital admission, and patients received an average  $\epsilon$ -aminocaproic acid dose of 40.6 g over 35.6 h. The overall rebleeding rate was low, 1.4%, and the rate of rehemorrhage per 24-h period was 0.71%. Vasospasm occurred in 11.5% of patients, and permanent neurologic deficits from ischemic stroke were seen in 7.2%.<sup>95</sup>

Overall, with the administration of antifibrinolytic therapy to prevent early rebleeding in subarachnoid hemorrhage, there appears to be no increased risk of ischemic events or adverse outcomes. Despite reduced rebleeding rates, additional improvement of outcomes with antifibrinolytic agents has not been established, likely due to the complexity of the original bleeding event, neurologic injury, and location of the bleed. Further complicating outcomes are concerns about optimal times to restart venous thromboembolic prophylaxis in these immobile patients.

## Topical Administration of Tranexamic Acid

A recent Cochrane review addressed the topical application of tranexamic acid in a large variety of clinical settings such as cardiac surgery, knee arthroplasty, and spinal surgery.<sup>96</sup> The authors concluded that topically administered tranexamic acid may reduce bleeding and transfusions, but expressed concern that safety data, particularly with regard to thromboembolic complications, are unknown. Topical administration of tranexamic acid may lead to lower plasma concentrations but variability depending on the dose used, the application site, and local reabsorption, and may achieve plasma concentrations that effectively inhibit systemic hyperfibrinolysis.<sup>96</sup>

## Summary

The use of antifibrinolytic therapy in the perioperative setting has been extensively studied. Most studies report that tranexamic acid and aprotinin are consistently associated with a reduction in bleeding and need for allogeneic transfusions. Despite the extensive use of  $\epsilon$ -aminocaproic acid primarily in the United States, there are far less safety and efficacy data regarding this agent. Although theoretical concerns about the potential for hypercoagulable effects of antifibrinolytic agents remain, the scientific data and clinical experience suggest the relative safety of these agents regarding thromboembolic complications. However, most of the available data are related to tranexamic acid. In patients undergoing cardiac surgery, the efficacy of tranexamic acid and aprotinin to reduce blood loss and transfusion is established. Although tranexamic acid–associated seizures occur only in cardiac surgical patients, their impact on clinical outcomes needs further investigation. The reintroduction of aprotinin in Europe will be accompanied by a large registry that hopefully will provide more data regarding previously raised safety concerns. In trauma patients, the extensive use of tranexamic acid is based on the CRASH-2 study that reported a reduced mortality with early tranexamic acid administration. Controversy regarding fibrinolytic shutdown in a subset of patients with traumatic injury and potential adverse effects of antifibrinolytics has limited routine administration of tranexamic acid in the United States. For orthopedic surgery, antifibrinolytic treatment is associated with clear reductions in bleeding and variable effects on reduction of allogeneic blood transfusions. There is good evidence for a reduction in transfusion requirements in liver transplantation for both aprotinin and tranexamic acid with no indication of an increased risk of thrombotic complications. The recently published data for the prevention of postpartum hemorrhage with antifibrinolytics are also further supported by the World Maternal Antifibrinolytic study.

## Research Support

Support was provided from institutional and/or departmental sources and grant No. NIGMS T32 GM08600 from Duke University Medical Center, Durham, North Carolina (to Dr. Quinones) and grant No. NHLBI K23 1K23HL127227-01A1 from Seton Dell Medical School Stroke Institute, Austin, Texas (principal investigator: Truman J. Milling, Jr., M.D.).



## Competing Interests

Dr. Levy serves on steering committees for Boehringer Ingelheim, CSL Behring, Grifols, and Instrumentation Labs, and on advisory committees for Leading Biosciences, Octapharma, Pfizer, and Portola. Dr. Milling is a member of a steering committee for Portola and is a consultant for CSL Behring. Dr. Key is a consultant for Bayer and CSL Behring and receives research support from Baxalta US Inc. The other authors declare no competing interests.

## Correspondence

Address correspondence to Dr. Levy: Department of Anesthesiology, 2301 Erwin Road, Box 3094, Duke University Medical Center, Durham, North Carolina 27710. jerrold.levy@duke.edu. Information on purchasing reprints may be found at [www.anesthesiology.org](http://www.anesthesiology.org) or on the masthead page at the beginning of this issue. ANESTHESIOLOGY's articles are made freely accessible to all readers, for personal use only, 6 months from the cover date of the issue.

## References

- Chapin JC, Hajjar KA: Fibrinolysis and the control of blood coagulation. *Blood Rev* 2015; 29:17–24
- Longstaff C, Kolev K: Basic mechanisms and regulation of fibrinolysis. *J Thromb Haemost* 2015; 13(suppl 1):S98–105
- Wiman B, Collen D: Molecular mechanism of physiological fibrinolysis. *Nature* 1978; 272:549–50
- Ilich A, Bokarev I, Key NS: Global assays of fibrinolysis. *Int J Lab Hematol* 2017; 39:441–7
- Levy JH: Antifibrinolytic therapy: New data and new concepts. *Lancet* 2010; 376:3–4
- Cesarman-Maus G, Hajjar KA: Molecular mechanisms of fibrinolysis. *Br J Haematol* 2005; 129:307–21
- Chandler WL: The human fibrinolytic system. *Crit Rev Oncol Hematol* 1996; 24:27–45
- Pasche B, Ouimet H, Francis S, Loscalzo J: Structural changes in platelet glycoprotein IIb/IIIa by plasmin: Determinants and functional consequences. *Blood* 1994; 83:404–14
- Karkouti K, Wijeyesundera DN, Yau TM, McCluskey SA, Tait G, Beattie WS: The risk-benefit profile of aprotinin *versus* tranexamic acid in cardiac surgery. *Anesth Analg* 2010; 110:21–9
- Medcalf RL: Fibrinolysis, inflammation, and regulation of the plasminogen activating system. *J Thromb Haemost* 2007; 5(suppl 1):132–42
- Syrovets T, Simmet T: Novel aspects and new roles for the serine protease plasmin. *Cell Mol Life Sci* 2004; 61:873–85
- Levy JH, Greenberg C: Biology of Factor XIII and clinical manifestations of Factor XIII deficiency. *Transfusion* 2013; 53:1120–31
- Bajzar L, Jain N, Wang P, Walker JB: Thrombin activatable fibrinolysis inhibitor: Not just an inhibitor of fibrinolysis. *Crit Care Med* 2004; 32(suppl 5):S320–4
- Kluft C, Verheijen JH, Jie AF, Rijken DC, Preston FE, Sue-Ling HM, Jespersen J, Aasen AO: The postoperative fibrinolytic shutdown: A rapidly reverting acute phase pattern for the fast-acting inhibitor of tissue-type plasminogen activator after trauma. *Scand J Clin Lab Invest* 1985; 45:605–10
- Moore HB, Moore EE, Gonzalez E, Chapman MP, Chin TL, Silliman CC, Banerjee A, Sauaia A: Hyperfibrinolysis, physiologic fibrinolysis, and fibrinolysis shutdown: The spectrum of postinjury fibrinolysis and relevance to antifibrinolytic therapy. *J Trauma Acute Care Surg* 2014; 77:811–7; discussion 817
- Moore EE, Moore HB, Gonzalez E, Chapman MP, Hansen KC, Sauaia A, Silliman CC, Banerjee A: Postinjury fibrinolysis shutdown: Rationale for selective tranexamic acid. *J Trauma Acute Care Surg* 2015; 78(6 suppl 1):S65–9
- Moore EE, Moore HB, Gonzalez E, Sauaia A, Banerjee A, Silliman CC: Rationale for the selective administration of tranexamic acid to inhibit fibrinolysis in the severely injured patient. *Transfusion* 2016; 56(suppl 2):S110–4
- Schöchl H, Frietsch T, Pavelka M, Jámor C: Hyperfibrinolysis after major trauma: Differential diagnosis of lysis patterns and prognostic value of thrombelastometry. *J Trauma* 2009; 67:125–31
- Chapman MP, Moore EE, Ramos CR, Ghasabian A, Harr JN, Chin TL, Stringham JR, Sauaia A, Silliman CC, Banerjee A: Fibrinolysis greater than 3% is the critical value for initiation of antifibrinolytic therapy. *J Trauma Acute Care Surg* 2013; 75:961–7; discussion 967
- Theusinger OM, Levy JH: Point of care devices for assessing bleeding and coagulation in the trauma patient. *Anesthesiol Clin* 2013; 31:55–65
- Raza I, Davenport R, Rourke C, Platton S, Manson J, Spoor C, Khan S, De'Ath HD, Allard S, Hart DP, Pasi KJ, Hunt BJ, Stanworth S, MacCallum PK, Brohi K: The incidence and magnitude of fibrinolytic activation in trauma patients. *J Thromb Haemost* 2013; 11:307–14
- Cotton BA, Harvin JA, Kostousou V, Minei KM, Radwan ZA, Schöchl H, Wade CE, Holcomb JB, Matijevic N: Hyperfibrinolysis at admission is an uncommon but highly lethal event associated with shock and prehospital fluid administration. *J Trauma Acute Care Surg* 2012; 73:365–70; discussion 370
- Tengborn L, Blombäck M, Berntorp E: Tranexamic acid—An old drug still going strong and making a revival. *Thromb Res* 2015; 135:231–42
- Kim H, Szlam F, Tanaka KA, van de Locht A, Ogawa S, Levy JH: The effects of MDCO-2010, a serine protease inhibitor, on activated clotting time in blood obtained from volunteers and cardiac surgical patients. *Anesth Analg* 2012; 115:244–52
- Sundaram S, Gikakis N, Hack CE, Niewiarowski S, Edmunds LH Jr, Koneti Rao A, Sun L, Cooper SL, Colman RW: Nafamostat mesilate, a broad spectrum protease inhibitor, modulates platelet, neutrophil and contact activation in simulated extracorporeal circulation. *Thromb Haemost* 1996; 75:76–82
- Flight SM, Johnson LA, Du QS, Warner RL, Trabi M, Gaffney PJ, Lavin MF, de Jersey J, Masci PP: Textilin-1, an alternative anti-bleeding agent to aprotinin: Importance of plasmin inhibition in controlling blood loss. *Br J Haematol* 2009; 145:207–11
- Koster A, Faraoni D, Levy JH: Antifibrinolytic therapy for cardiac surgery: An update. *ANESTHESIOLOGY* 2015; 123:214–21
- Mojcik CF, Levy JH: Aprotinin and the systemic inflammatory response after cardiopulmonary bypass. *Ann Thorac Surg* 2001; 71:745–54
- Day JR, Punjabi PP, Randi AM, Haskard DO, Landis RC, Taylor KM: Clinical inhibition of the seven-transmembrane thrombin receptor (PAR1) by intravenous aprotinin during cardiothoracic surgery. *Circulation* 2004; 110:2597–600
- Levy JH, Pifarre R, Schaff HV, Horrow JC, Albus R, Spiess B, Rosengart TK, Murray J, Clark RE, Smith P: A multicenter, double-blind, placebo-controlled trial of aprotinin for reducing blood loss and the requirement for donor-blood transfusion in patients undergoing repeat coronary artery bypass grafting. *Circulation* 1995; 92:2236–44
- Spiess BD, Royston D, Levy JH, Fitch J, Dietrich W, Body S, Murkin J, Nadel A: Platelet transfusions during coronary artery bypass graft surgery are associated with serious adverse outcomes. *Transfusion* 2004; 44:1143–8
- European Society of Anaesthesiology Task Force Reports on Place of Aprotinin in Clinical Anaesthesia: Aprotinin: Is it time to reconsider? *Eur J Anaesthesiol* 2015; 32:591–5
- Nilsson IM, Andersson L, Björkman SE: Epsilon-aminocaproic acid (E-ACA) as a therapeutic agent based on 5 year's clinical experience. *Acta Med Scand Suppl* 1966; 448:1–46



34. Nilsson IM, Sjoerdsma A, Waldenstrom J: Antifibrinolytic activity and metabolism of 6-aminocaproic acid in man. *Lancet* 1960; 1:1322–6
35. McNicol GP, Douglas AS: Epsilon-aminocaproic acid and other inhibitors of fibrinolysis. *Br Med Bull* 1964; 20:233–9
36. Nilsson IM: Clinical pharmacology of aminocaproic and tranexamic acids. *J Clin Pathol Suppl (R Coll Pathol)* 1980; 14:41–7
37. Seymour BD, Rubinger M: Rhabdomyolysis induced by epsilon-aminocaproic acid. *Ann Pharmacother* 1997; 31:56–8
38. Vanneste JA, van Wijngaarden GK: Epsilon-aminocaproic acid myopathy. Report of a case and literature review. *Eur Neurol* 1982; 21:242–8
39. Eriksson O, Kjellman H, Pilbrant A, Schannong M: Pharmacokinetics of tranexamic acid after intravenous administration to normal volunteers. *Eur J Clin Pharmacol* 1974; 7:375–80
40. Andersson L, Nilsson IM, Colleen S, Granstrand B, Melander B: Role of urokinase and tissue activator in sustaining bleeding and the management thereof with EACA and AMCA. *Ann NY Acad Sci* 1968; 146:642–58
41. Ducloy-Bouthors AS, Jude B, Duhamel A, Broisin F, Huissoud C, Keita-Meyer H, Mandelbrot L, Tillouche N, Fontaine S, Le Goueff F, Depret-Mosser S, Vallet B, Susen S; EXADELI Study Group: High-dose tranexamic acid reduces blood loss in postpartum haemorrhage. *Crit Care* 2011; 15:R117
42. Faraoni D, Carlier C, Samama CM, Levy JH, Ducloy-Bouthors AS: Efficacy and safety of tranexamic acid administration for the prevention and/or the treatment of post-partum haemorrhage: a systematic review with meta-analysis [article in French]. *Ann Fr Anesth Reanim* 2014; 33:563–71
43. Preston JT, Cameron IT, Adams EJ, Smith SK: Comparative study of tranexamic acid and norethisterone in the treatment of ovulatory menorrhagia. *Br J Obstet Gynaecol* 1995; 102:401–6
44. Berntorp E, Folrud C, Lethagen S: No increased risk of venous thrombosis in women taking tranexamic acid. *Thromb Haemost* 2001; 86:714–5
45. Aronson DL, Chang P, Kessler CM: Platelet-dependent thrombin generation after *in vitro* fibrinolytic treatment. *Circulation* 1992; 85:1706–12
46. Eisenberg PR, Miletich JP: Induction of marked thrombin activity by pharmacologic concentrations of plasminogen activators in nonanticoagulated whole blood. *Thromb Res* 1989; 55:635–43
47. Eisenberg PR, Miletich JP, Sobel BE, Jaffe AS: Differential effects of activation of prothrombin by streptokinase compared with urokinase and tissue-type plasminogen activator (t-PA). *Thromb Res* 1988; 50:707–17
48. Winters KJ, Santoro SA, Miletich JP, Eisenberg PR: Relative importance of thrombin compared with plasmin-mediated platelet activation in response to plasminogen activation with streptokinase. *Circulation* 1991; 84:1552–60
49. Shakur H, Roberts I, Bautista R, Caballero J, Coats T, Dewan Y, El-Sayed H, Gogichaishvili T, Gupta S, Herrera J, Hunt B, Iribhogbe P, Izurieta M, Khamis H, Komolafe E, Marrero MA, Mejia-Mantilla J, Miranda J, Morales C, Olaomi O, Ollidashi F, Perel P, Peto R, Ramana PV, Ravi RR, Yuthakasemsunt S: Effects of tranexamic acid on death, vascular occlusive events, and blood transfusion in trauma patients with significant haemorrhage (CRASH-2): A randomised, placebo-controlled trial. *Lancet* 2010; 376:23–32
50. Sukeik M, Alshryda S, Haddad FS, Mason JM: Systematic review and meta-analysis of the use of tranexamic acid in total hip replacement. *J Bone Joint Surg Br* 2011; 93:39–46
51. Alshryda S, Sarda P, Sukeik M, Nargol A, Blenkinsopp J, Mason JM: Tranexamic acid in total knee replacement: A systematic review and meta-analysis. *J Bone Joint Surg Br* 2011; 93:1577–85
52. Alshryda S, Sukeik M, Sarda P, Blenkinsopp J, Haddad FS, Mason JM: A systematic review and meta-analysis of the topical administration of tranexamic acid in total hip and knee replacement. *Bone Joint J* 2014; 96-B:1005–15
53. Ross J, Al-Shahi Salman R: The frequency of thrombotic events among adults given antifibrinolytic drugs for spontaneous bleeding: Systematic review and meta-analysis of observational studies and randomized trials. *Curr Drug Saf* 2012; 7:44–54
54. Kagoma YK, Crowther MA, Douketis J, Bhandari M, Eikelboom J, Lim W: Use of antifibrinolytic therapy to reduce transfusion in patients undergoing orthopedic surgery: A systematic review of randomized trials. *Thromb Res* 2009; 123:687–96
55. Molenaar IQ, Warnaar N, Groen H, Tenvergert EM, Slooff MJ, Porte RJ: Efficacy and safety of antifibrinolytic drugs in liver transplantation: A systematic review and meta-analysis. *Am J Transplant* 2007; 7:185–94
56. Foley JH: Plasmin(ogen) at the nexus of fibrinolysis, inflammation, and complement. *Semin Thromb Hemost* 2017; 43:135–42
57. Syrovets T, Jendrach M, Rohwedder A, Schüle A, Simmet T: Plasmin-induced expression of cytokines and tissue factor in human monocytes involves AP-1 and IKK $\beta$ -mediated NF- $\kappa$ B activation. *Blood* 2001; 97:3941–50
58. Burysek L, Syrovets T, Simmet T: The serine protease plasmin triggers expression of MCP-1 and CD40 in human primary monocytes via activation of p38 MAPK and janus kinase (JAK)/STAT signaling pathways. *J Biol Chem* 2002; 277:33509–17
59. Gong Y, Hart E, Shchurin A, Hoover-Plow J: Inflammatory macrophage migration requires MMP-9 activation by plasminogen in mice. *J Clin Invest* 2008; 118:3012–24
60. Later AF, Sitniakowsky LS, van Hiltten JA, van de Watering L, Brand A, Smit NP, Klautz RJ: Antifibrinolytics attenuate inflammatory gene expression after cardiac surgery. *J Thorac Cardiovasc Surg* 2013; 145:1611–6, 1616.e1–4
61. Renckens R, Weijer S, de Vos AF, Pater JM, Meijers JC, Hack CE, Levi M, van der Poll T: Inhibition of plasmin activity by tranexamic acid does not influence inflammatory pathways during human endotoxemia. *Arterioscler Thromb Vasc Biol* 2004; 24:483–8
62. Horrow JC, Van Riper DE, Strong MD, Grunewald KE, Parmet JL: The dose-response relationship of tranexamic acid. *ANESTHESIOLOGY* 1995; 82:383–92
63. Fiechtner BK, Nuttall GA, Johnson ME, Dong Y, Sujrattanaawimol N, Oliver WC Jr, Sarpal RS, Oyen LJ, Ereth MH: Plasma tranexamic acid concentrations during cardiopulmonary bypass. *Anesth Analg* 2001; 92:1131–6
64. Dowd NP, Karski JM, Cheng DC, Carroll JA, Lin Y, James RL, Butterworth J: Pharmacokinetics of tranexamic acid during cardiopulmonary bypass. *ANESTHESIOLOGY* 2002; 97:390–9
65. Sharma V, Fan J, Jerath A, Pang KS, Bojko B, Pawliszyn J, Karski JM, Yau T, McCluskey S, Wasowicz M: Pharmacokinetics of tranexamic acid in patients undergoing cardiac surgery with use of cardiopulmonary bypass. *Anaesthesia* 2012; 67:1242–50
66. Murkin JM, Falter F, Granton J, Young B, Burt C, Chu M: High-dose tranexamic acid is associated with nonischemic clinical seizures in cardiac surgical patients. *Anesth Analg* 2010; 110:350–3
67. Lecker I, Wang DS, Romaschin AD, Peterson M, Mazer CD, Orser BA: Tranexamic acid concentrations associated with human seizures inhibit glycine receptors. *J Clin Invest* 2012; 122:4654–66
68. Myles PS, Smith JA, Forbes A, Silbert B, Jayarajah M, Painter T, Cooper DJ, Marasco S, McNeil J, Bussi eres JS, McGuinness S, Byrne K, Chan MT, Landoni G, Wallace S; ATACAS Investigators of the ANZCA Clinical Trials Network:

- Tranexamic acid in patients undergoing coronary-artery surgery. *N Engl J Med* 2017; 376:136–48
69. Koster A, Levy JH: Understanding potential drug side effects: Can we translate molecular mechanisms to clinical applications? *ANESTHESIOLOGY* 2017; 127:6–8
  70. Takagi H, Ando T, Umemoto T; All-Literature Investigation of Cardiovascular Evidence (ALICE) group: Seizures associated with tranexamic acid for cardiac surgery: A meta-analysis of randomized and non-randomized studies. *J Cardiovasc Surg (Torino)* 2017; 58:633–41
  71. Maeda T, Sasabuchi Y, Matsui H, Ohnishi Y, Miyata S, Yasunaga H: Safety of tranexamic acid in pediatric cardiac surgery: A nationwide database study. *J Cardiothorac Vasc Anesth* 2017; 31:549–53
  72. Roulet S, Pillot J, Freyburger G, Biais M, Quinart A, Rault A, Revel P, Sztark F: Rotation thromboelastometry detects thrombocytopenia and hypofibrinogenemia during orthotopic liver transplantation. *Br J Anaesth* 2010; 104:422–8
  73. Porte RJ, Molenaar IQ, Begliomini B, Groenland TH, Januszkiewicz A, Lindgren L, Palareti G, Hermans J, Terpstra OT: Aprotinin and transfusion requirements in orthotopic liver transplantation: A multicentre randomised double-blind study. *EMSALT Study Group. Lancet* 2000; 355:1303–9
  74. Dalmau A, Sabaté A, Acosta F, Garcia-Huete L, Koo M, Sansano T, Rafecas A, Figueras J, Jaurrieta E, Parrilla P: Tranexamic acid reduces red cell transfusion better than epsilon-aminocaproic acid or placebo in liver transplantation. *Anesth Analg* 2000; 91:29–34
  75. Wu CC, Ho WM, Cheng SB, Yeh DC, Wen MC, Liu TJ, P'eng FK: Perioperative parenteral tranexamic acid in liver tumor resection: A prospective randomized trial toward a "blood transfusion"-free hepatectomy. *Ann Surg* 2006; 243:173–80
  76. Zufferey P, Merquiol F, Laporte S, Decousus H, Mismetti P, Auboyer C, Samama CM, Molliex S: Do antifibrinolytics reduce allogeneic blood transfusion in orthopedic surgery? *ANESTHESIOLOGY* 2006; 105:1034–46
  77. Tan J, Chen H, Liu Q, Chen C, Huang W: A meta-analysis of the effectiveness and safety of using tranexamic acid in primary unilateral total knee arthroplasty. *J Surg Res* 2013; 184:880–7
  78. Li ZJ, Fu X, Xing D, Zhang HF, Zang JC, Ma XL: Is tranexamic acid effective and safe in spinal surgery? A meta-analysis of randomized controlled trials. *Eur Spine J* 2013; 22:1950–7
  79. Churchill JL, Puca KE, Meyer E, Carleton M, Anderson MJ: Comparing ε-aminocaproic acid and tranexamic acid in reducing postoperative transfusions in total knee arthroplasty. *J Knee Surg* 2017; 30:460–6
  80. Churchill JL, Puca KE, Meyer ES, Carleton MC, Truchan SL, Anderson MJ: Comparison of ε-aminocaproic acid and tranexamic acid in reducing postoperative transfusions in total hip arthroplasty. *J Arthroplasty* 2016; 31:2795–2799.e1
  81. Zufferey PJ, Lanoiselée J, Chapelle C, Borisov DB, Bien JY, Lambert P, Philippot R, Molliex S, Delavenne X; investigators of the PeriOpeRative Tranexamic acid in hip arthrOplasty (PORTO) Study: Intravenous tranexamic acid bolus plus infusion is not more effective than a single bolus in primary hip arthroplasty: A randomized controlled trial. *ANESTHESIOLOGY* 2017; 127:413–22
  82. Novikova N, Hofmeyr GJ: Tranexamic acid for preventing postpartum haemorrhage. *Cochrane Database Syst Rev* 2010:CD007872
  83. Roberts I, Ker K: Tranexamic acid for postpartum bleeding. *Int J Gynaecol Obstet* 2011; 115:220–1
  84. Collaborators WT: Effect of early tranexamic acid administration on mortality, hysterectomy, and other morbidities in women with post-partum haemorrhage (WOMAN): An international, randomised, double-blind, placebo-controlled trial. *Lancet* 2017; 389: 2105–16
  85. Binz S, McCollister J, Thomas S, Miller J, Pohlman T, Waxman D, Shariff F, Tracy R, Walsh M: CRASH-2 study of tranexamic acid to treat bleeding in trauma patients: A controversy fueled by science and social media. *J Blood Transfus* 2015; 2015:874920
  86. Chang R, Cardenas JC, Wade CE, Holcomb JB: Advances in the understanding of trauma-induced coagulopathy. *Blood* 2016; 128:1043–9
  87. Ives C, Inaba K, Branco BC, Okoye O, Schochl H, Talving P, Lam L, Shulman I, Nelson J, Demetriades D: Hyperfibrinolysis elicited via thromboelastography predicts mortality in trauma. *J Am Coll Surg* 2012; 215:496–502
  88. Starke RM, Connolly ES Jr, Participants in the International Multi-Disciplinary Consensus Conference on the Critical Care Management of Subarachnoid H: Rebleeding after aneurysmal subarachnoid hemorrhage. *Neurocrit Care* 2011; 15:241–6
  89. Rosenørn J, Eskesen V, Schmidt K, Rønde F: The risk of rebleeding from ruptured intracranial aneurysms. *J Neurosurg* 1987; 67:329–32
  90. Roos Y, Rinkel G, Vermeulen M, Algra A, van Gijn J: Antifibrinolytic therapy for aneurysmal subarachnoid hemorrhage: A major update of a cochrane review. *Stroke* 2003; 34:2308–9
  91. Baharoglu MI, Germans MR, Rinkel GJ, Algra A, Vermeulen M, van Gijn J, Roos YB: Antifibrinolytic therapy for aneurysmal subarachnoid haemorrhage. *Cochrane Database Syst Rev* 2013:CD001245
  92. Roos Y: Antifibrinolytic treatment in subarachnoid hemorrhage: A randomized placebo-controlled trial. *STAR Study Group. Neurology* 2000; 54:77–82
  93. Hillman J, Fridriksson S, Nilsson O, Yu Z, Saveland H, Jakobsson KE: Immediate administration of tranexamic acid and reduced incidence of early rebleeding after aneurysmal subarachnoid hemorrhage: A prospective randomized study. *J Neurosurg* 2002; 97:771–8
  94. Starke RM, Kim GH, Fernandez A, Komotar RJ, Hickman ZL, Otten ML, Ducruet AF, Kellner CP, Hahn DK, Chwajol M, Mayer SA, Connolly ES Jr: Impact of a protocol for acute antifibrinolytic therapy on aneurysm rebleeding after subarachnoid hemorrhage. *Stroke* 2008; 39:2617–21
  95. Harrigan MR, Rajneesh KF, Ardelt AA, Fisher WS III: Short-term antifibrinolytic therapy before early aneurysm treatment in subarachnoid hemorrhage: Effects on rehemorrhage, cerebral ischemia, and hydrocephalus. *Neurosurgery* 2010; 67:935–9; discussion 939–40
  96. Ker K, Beecher D, Roberts I: Topical application of tranexamic acid for the reduction of bleeding. *Cochrane Database Syst Rev* 2013:CD010562
